# Supplementary material for: Colorectal cancer-associated Streptococcus infantarius subsp. infantarius differ from a major dairy lineage providing evidence for pathogenic, pathobiont and food-grade lineages
Source: PubMed Central journal article supplement (PMC6003927; doi:10.1038/s41598-018-27383-4), 2018-06-15
Supplement: 41598_2018_27383_MOESM1_ESM.pdf [file 41598_2018_27383_MOESM1_ESM.pdf]

# Colorectal cancer-associated *Streptococcus infantarius* subsp. *infantarius* differ from a major dairy lineage providing evidence for pathogenic, pathobiont and food-grade lineages

Dasel Wambua Mulwa Kaindi<sup>1</sup>, Wambui Kogi-Makau<sup>1</sup>, Godfrey Nsereko Lule<sup>2</sup>, Bernd Kreikemeyer<sup>3</sup>, Pierre Renault<sup>4</sup>, Bassirou Bonfoh<sup>5,6,7</sup>, Nize Otaru<sup>8</sup>, Thomas Schmid<sup>8</sup>, Leo Meile<sup>8</sup>, Jan Hattendorf<sup>6,7</sup>, Christoph Jans<sup>8\*</sup>

## Institutional affiliations

1 Department of Food Science, Nutrition and Technology, University of Nairobi, Nairobi, Kenya

2 School of Medicine, University of Nairobi, Nairobi, Kenya

3 Institute of Medical Microbiology, Virology, and Hygiene, Rostock University Medical Centre Rostock, Germany.

4 Institut National de la Recherche Agronomique, UMR 1319 MICALIS, Jouy-en-Josas, France

5 Centre Suisse de Recherches Scientifiques en Côte d'Ivoire, Adiopodoume, Côte d'Ivoire

6 Department of Epidemiology and Public Health, Swiss Tropical and Public Health Institute, Basel, Switzerland

7 University of Basel, Basel, Switzerland

8 Laboratory of Food Biotechnology, ETH Zurich, Zurich, Switzerland

\*Address correspondence to Christoph Jans, christoph.jans@hest.ethz.ch

**Supplementary Figure S1, Table S1 and Table S2**

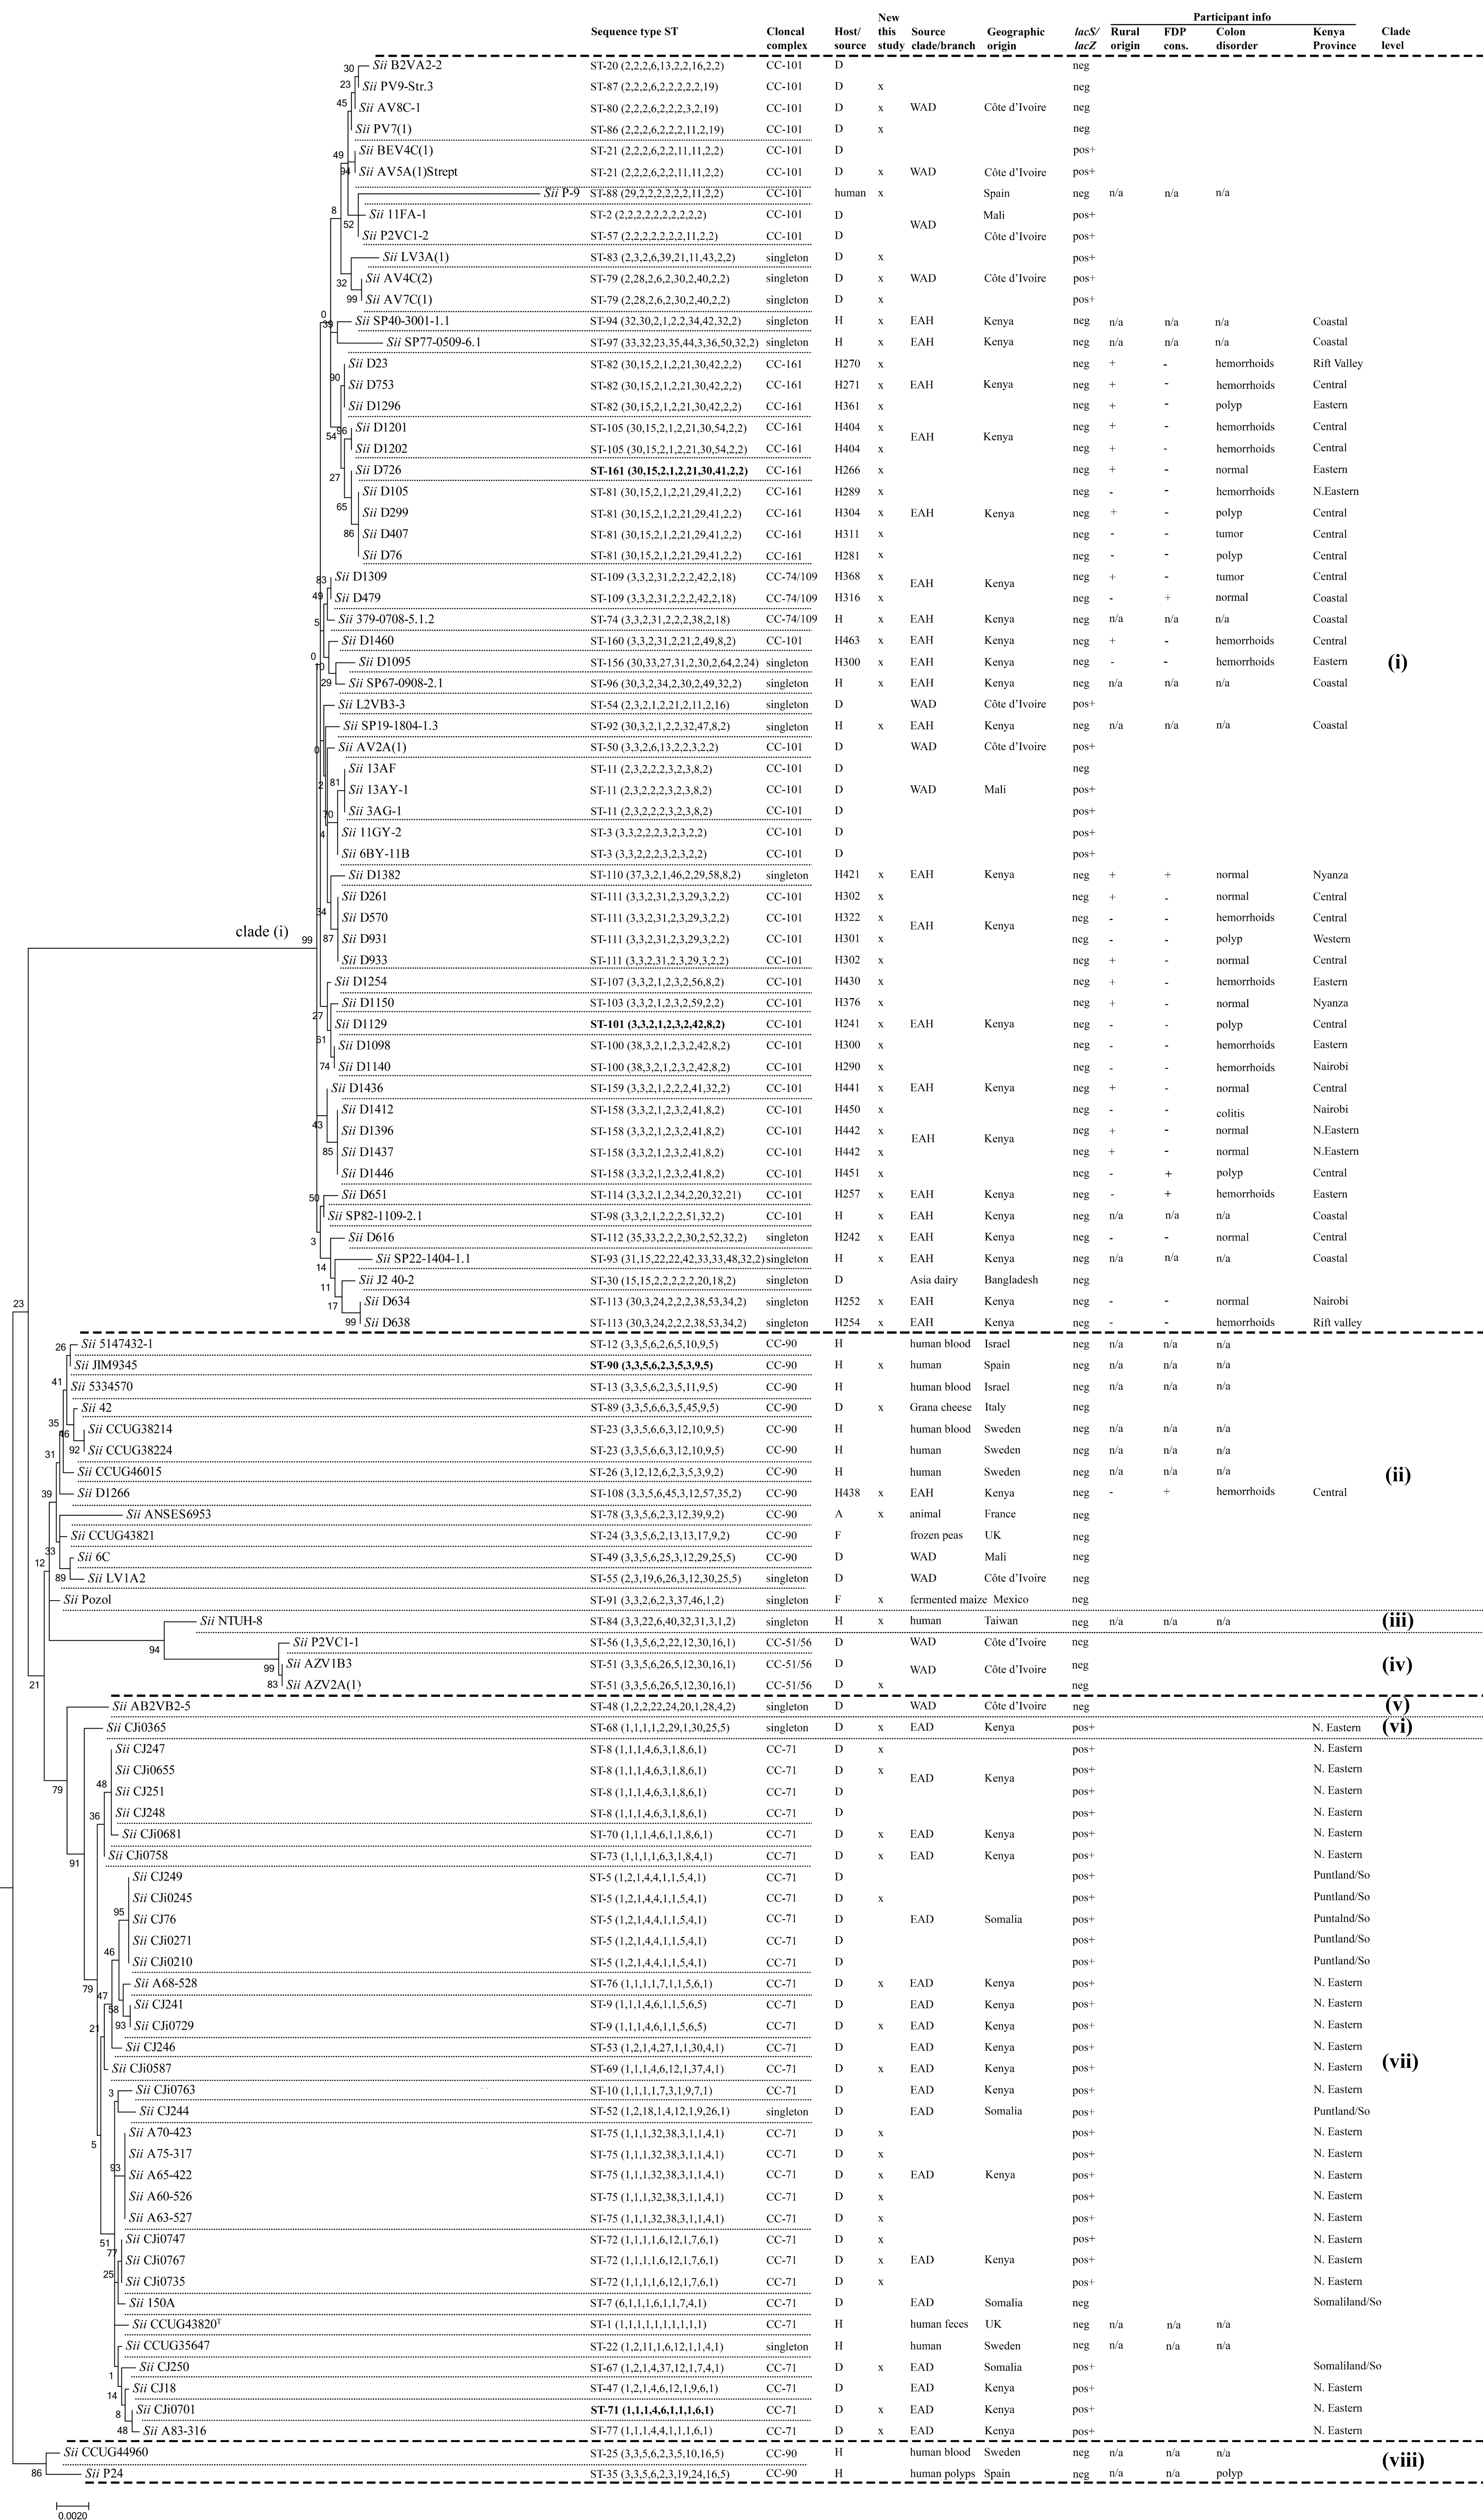

**Supplementary Table S1: Diversity range of East African Dairy (EAD), East African Human (EAH) and West African Dairy (WAD) *Sii* isolates calculated for MLST allele profiles and sequence types (ST).**

|              | Simpson's Index of Diversity (SID) (95% CI) <sup>1</sup> |                     |                     |                     |                              |                          |                          |                           |                 |                 |                 |
|--------------|----------------------------------------------------------|---------------------|---------------------|---------------------|------------------------------|--------------------------|--------------------------|---------------------------|-----------------|-----------------|-----------------|
|              | All <i>Sii</i>                                           | all <i>Sii</i> EAH  | All <i>Sii</i> EAD  | all <i>Sii</i> WAD  | <i>Sii</i> clade (i) EAH+WAD | <i>Sii</i> clade (i) EAH | <i>Sii</i> clade (i) WAD | <i>S. galloyticus</i> all | <i>Sgm</i>      | <i>Sgg</i>      | <i>Sgp</i>      |
| ST           | 0.990 (0.940-1)                                          | 0.970 (0.828-1)     | 0.940 (0.737-1)     | 0.975 (0.772-1)     | 0.981 (0.884-1)              | 0.968 (0.822-1)          | 0.961 (0.688-1)          | 0.996 (0.819-1)           | 1 (0.621-1)     | 1 (0.391-1)     | 0.952 (0.367-1) |
| <i>ddl</i>   | 0.763 (0.603-0.924)                                      | 0.662 (0.363-0.961) | 0.063 (0-0.231)     | 0.507 (0.099-0.915) | 0.745 (0.513-0.978)          | 0.668 (0.367-0.969)      | 0.294 (0-0.716)          | 0.901 (0.614-1)           | 0.644 (0.02-1)  | 1 (0.391-1)     | 0.667 (0-1)     |
| <i>gki</i>   | 0.719 (0.550-0.889)                                      | 0.535 (0.223-0.847) | 0.417 (0.070-0.764) | 0.583 (0.178-0.989) | 0.629 (0.374-0.884)          | 0.544 (0.228-0.859)      | 0.627 (0.164-1)          | 0.917 (0.643-1)           | 0.867 (0.343-1) | 0.6 (0-1)       | 0.571 (0-1)     |
| <i>glnA</i>  | 0.659 (0.480-0.837)                                      | 0.273 (0-0.549)     | 0.063 (0-0.231)     | 0.359 (0-0.746)     | 0.166 (0-0.36)               | 0.236 (0-0.502)          | 0 (0-0)                  | 0.798 (0.444-1)           | 0.2 (0-0.686)   | 0.6 (0-1)       | 0.714 (0-1)     |
| <i>mutS</i>  | 0.792 (0.638-0.946)                                      | 0.587 (0.278-0.896) | 0.599 (0.250-0.948) | 0.543 (0.136-0.951) | 0.727 (0.49-0.964)           | 0.565 (0.251-0.88)       | 0.569 (0.099-1)          | 0.925 (0.659-1)           | 0.867 (0.343-1) | 0.6 (0-1)       | 0.667 (0-1)     |
| <i>mutS2</i> | 0.645 (0.465-0.825)                                      | 0.188 (0-0.429)     | 0.724 (0.400-1)     | 0.551 (0.143-0.958) | 0.197 (0-0.405)              | 0.146 (0-0.367)          | 0.307 (0-0.735)          | 0.933 (0.674-1)           | 0.8 (0.232-1)   | 0.933 (0.254-1) | 0.667 (0-1)     |
| <i>pheS</i>  | 0.795 (0.642-0.948)                                      | 0.746 (0.468-1)     | 0.690 (0.357-1)     | 0.783 (0.429-1)     | 0.74 (0.506-0.974)           | 0.694 (0.396-0.991)      | 0.686 (0.236-1)          | 0.826 (0.486-1)           | 0.378 (0-0.977) | 0.6 (0-1)       | 0.524 (0-1)     |
| <i>proS</i>  | 0.793 (0.640-0.947)                                      | 0.728 (0.445-1)     | 0 (0-0)             | 0.572 (0.166-0.979) | 0.627 (0.372-0.883)          | 0.714 (0.423-1)          | 0.294 (0-0.716)          | 0.862 (0.544-1)           | 0.511 (0-1)     | 0.8 (0.03-1)    | 0.571 (0-1)     |
| <i>pyrE</i>  | 0.952 (0.865-1)                                          | 0.890 (0.679-1)     | 0.843 (0.569-1)     | 0.859 (0.547-1)     | 0.909 (0.746-1)              | 0.885 (0.667-1)          | 0.784 (0.371-1)          | 0.858 (0.538-1)           | 0.733 (0.134-1) | 0.933 (0.254-1) | 0.286 (0-0.936) |
| <i>thrS</i>  | 0.846 (0.708-0.984)                                      | 0.689 (0.396-0.982) | 0.605 (0.257-0.953) | 0.594 (0.19-0.998)  | 0.588 (0.329-0.847)          | 0.673 (0.373-0.973)      | 0.294 (0-0.716)          | 0.858 (0.538-1)           | 0.533 (0-1)     | 0.8 (0.03-1)    | 0.476 (0-1)     |
| <i>tpi</i>   | 0.643 (0.463-0.823)                                      | 0.228 (0-0.488)     | 0.175 (0-0.441)     | 0.594 (0.19-0.998)  | 0.285 (0.049-0.521)          | 0.233 (0-0.498)          | 0.386 (0-0.839)          | 0.866 (0.551-1)           | 0.644 (0.02-1)  | 0.533 (0-1)     | 0.571 (0-1)     |

<sup>1</sup>) CI=confidence interval

**Supplementary Table S2: Identity range of East African Dairy (EAD), East African Human (EAH) and West African Dairy (WAD) *Sii* isolates calculated for concatenated sequences of all 10 alleles per isolate.**

|                 | DNA sequence identity of all 10 MLST loci <sup>1</sup> |         |         |         |                   |               |               |                           |                         |                         |            |
|-----------------|--------------------------------------------------------|---------|---------|---------|-------------------|---------------|---------------|---------------------------|-------------------------|-------------------------|------------|
|                 | All <i>Sii</i>                                         | all EAH | all EAD | all WAD | clade (i) EAH+WAD | clade (i) EAH | clade (i) WAD | <i>S. galloyticus</i> all | <i>Sgm</i> <sup>2</sup> | <i>Sgg</i> <sup>3</sup> | <i>Sgp</i> |
| Mean identity % | 98.6                                                   | 99.6    | 99.8    | 98.7    | 99.7              | 99.7          | 99.8          | 97.9                      | 98.4 (98.8)             | 99.2 (99.5)             | 99.5       |
| Max identity %  | 100                                                    | 100     | 100     | 100     | 100               | 100           | 100           | 100                       | 99.9 (99.9)             | 99.8 (99.8)             | 99.2       |
| Min identity %  | 95.6                                                   | 97.6    | 99.5    | 96.6    | 99.4              | 99.4          | 99.6          | 95.6                      | 95.6 (97.3)             | 98.5 (99.2)             | 99.2       |

<sup>1</sup>) calculated from concatenated DNA sequences of each isolate for a total sequence length of 4641bp per isolate; <sup>2</sup>) values in bracket for *Sgm* excluding PV1(1); <sup>3</sup>) values in brackets for *Sgg* excluding LMG17956.
